# Supplementary material for: Analysis and Prediction of the Factors Influencing Postconstruction Surface Deformation of Pipe-Jacking Tunnel in Soft Clay Strata in China
Source: Hindawi journal article supplement (doi:10.1155/2023/6474415), 2023-06-05
Supplement: f1 [file 6474415.f1.docx]

**Supplementary Materials**

**Correlation analysis principle**

Correlation analysis is a statistical analysis technique that examines the linear relationship between two or more variable elements. To accurately mine the correlation among variables, quantitative investigations must be conducted through hypothesis testing and calculating correlation coefficients. Simple and partial correlation analyses are the most used methods to study multivariable correlation at large spatio-temporal scales. Simple correlation analysis can determine the linear correlation between two variables, whereas partial correlation analysis measures the net correlation between two variables under the condition of controlling or eliminating the influence of other variables.

A simple correlation coefficient calculation is given as

(S1)

In Equation (S1), *Rxy* is the correlation index of two variables; *x,y* andare two variables and their mean values, respectively, and *n* is the number of samples.

The partial correlation coefficient calculation is as follows.

. (S2)

In Equation (S2), *rxy*,*z*, also called the first-order partial correlation coefficient, is used to analyze the partial correlation among the three variables, where *rxy*,*z* is the partial correlation coefficient between the *x* and *y* after *z* is eliminated. *rxy*, *rxz*, and *ryz* are the simple correlation coefficients between *x* and *y*, *x* and *z*, and *y* and *z* variables, respectively. The calculation of higher-order partial correlation coefficients between four or more variables is shown in Equation (S3).

. (S3)

A significance test reflects the significant difference between sample statistics and hypothetical population parameters (Zhao 2021). In the test, the principle of small probability is used to assume the determination limit, namely the significance level (*P* = 0.05 or *P* = 0.01). The Pearson correlation coefficient can measure the degree of correlation between two variables. When the calculated significance probability *P* is less than α, there is a significant correlation between the two variables; otherwise, there is no significant correlation. A positive sign indicates a positive correlation, a negative sign indicates a negative correlation, and a larger absolute value indicates a stronger correlation; the maximum absolute value is 1.
